# Supplementary material for: Strong relaxor enabling excellent capacitive energy storage performance in Bi0.5Na0.5TiO3-based binary system
Source: Royal Society of Chemistry journal article supplement (doi:10.1039/d4ta09041a), 2025-01-01
Supplement: d4ta09041a1.pdf [file d4ta09041a1.pdf]

## ***Supporting Information***

### **Strong relaxor enabled excellent capacitive energy storage performance in $\text{Bi}_{0.5}\text{Na}_{0.5}\text{TiO}_3$ -based binary system**

Zhiqing Li<sup>a</sup>, Bing Xie<sup>a\*</sup>, Zhiyong Liu<sup>a</sup>, Kun Guo<sup>a</sup>, Kai Li<sup>b</sup>, Haibo Zhang<sup>c</sup>, Huajie Luo<sup>d\*</sup>,

<sup>a</sup>*School of Power and Energy, Jiangxi Key Laboratory of Green General Aviation Power,  
Nanchang Hangkong University, Nanchang 330063, China*

<sup>b</sup>*Guangdong Provincial Key Laboratory of Electronic Functional Materials and Devices,  
Huizhou University, Huizhou 516001, China*

<sup>c</sup>*School of Materials Science and Engineering, Huazhong University of Science and  
Technology, Wuhan, 430074, China*

<sup>d</sup>*School of Materials Science and Engineering, University of Science and Technology Beijing,  
Beijing 100083, China*

\*Corresponding authors: [xieb@nchu.edu.cn](mailto:xieb@nchu.edu.cn) (BX) and [hjluo@ustb.edu.cn](mailto:hjluo@ustb.edu.cn) (HL)

## Material preparation

Ceramics composed of  $(1-x)\text{Bi}_{0.5}\text{Na}_{0.5}\text{TiO}_3-x\text{SmFeO}_3$  [(1-x)BNT-xSF] with  $x$  values of 0.05, 0.1, 0.15, and 0.2 were synthesized using the solid-state method. High-purity raw materials, namely  $\text{Na}_2\text{CO}_3$  ( $\geq 99.8\%$ ),  $\text{Bi}_2\text{O}_3$  ( $\geq 99\%$ ),  $\text{TiO}_2$  ( $\geq 98\%$ ),  $\text{Fe}_2\text{O}_3$  ( $\geq 99\%$ ) and  $\text{Sm}_2\text{O}_3$  ( $\geq 99.9\%$ ), supplied by Sinopharm Chemical Reagent Co., Ltd, China, were measured in stoichiometric proportions. The powders underwent two stages of ball milling at 300 rpm for 24 hours with an intermediate calcination step at 850 °C for 6 hours. After drying, the powder mixture was granulated using 3 wt.% polyvinyl alcohol (PVA) as a binder. Subsequently, the granulated powders were compacted into pellets under a pressure of 200 MPa and then sintered at temperatures ranging from 1000 to 1100 °C for 2 hours. The thickness of the ceramic sample is around 40  $\mu\text{m}$  -80  $\mu\text{m}$ .

## Characterization

The phase composition of the ceramics was determined using XRD analysis with a D8 ADVANCE-A25 system from Bruker, Germany. The microstructure and elemental distribution were examined using a FE-SEM (Zeiss Gemini SEM 300, Germany) and energy-dispersive spectroscopy (EDS) with an Oxford Instruments X-MaxN SN 78861 detector, respectively. Prior to analysis, the ceramic samples were polished and subjected to thermal etching at temperatures ranging from 950 to 1050 °C for 0.5 hours. The grain sizes of the ceramics were quantified using ImageJ software. Dielectric properties, specifically the dielectric constant and loss, were measured from 25 to 400 °C and across a frequency range of 1 to 1000 kHz using a DPTS-AT-600 dielectric testing system from China. Breakdown strength was assessed using a dielectric breakdown test system from PolyK Technologies, USA, with voltage increments of

500 V per second. The  $P$ - $E$  loop characteristics of the ceramics were studied at 10 Hz using ferroelectric test equipment from PolyK Technologies, USA. The frequency and temperature stability were investigated using a PolyK Technologies, USA. Fatigue stability was recorded using another ferroelectric test device (FETS-2000, China). Finally, charge and discharge behavior were evaluated using a CCDM-1000 system.

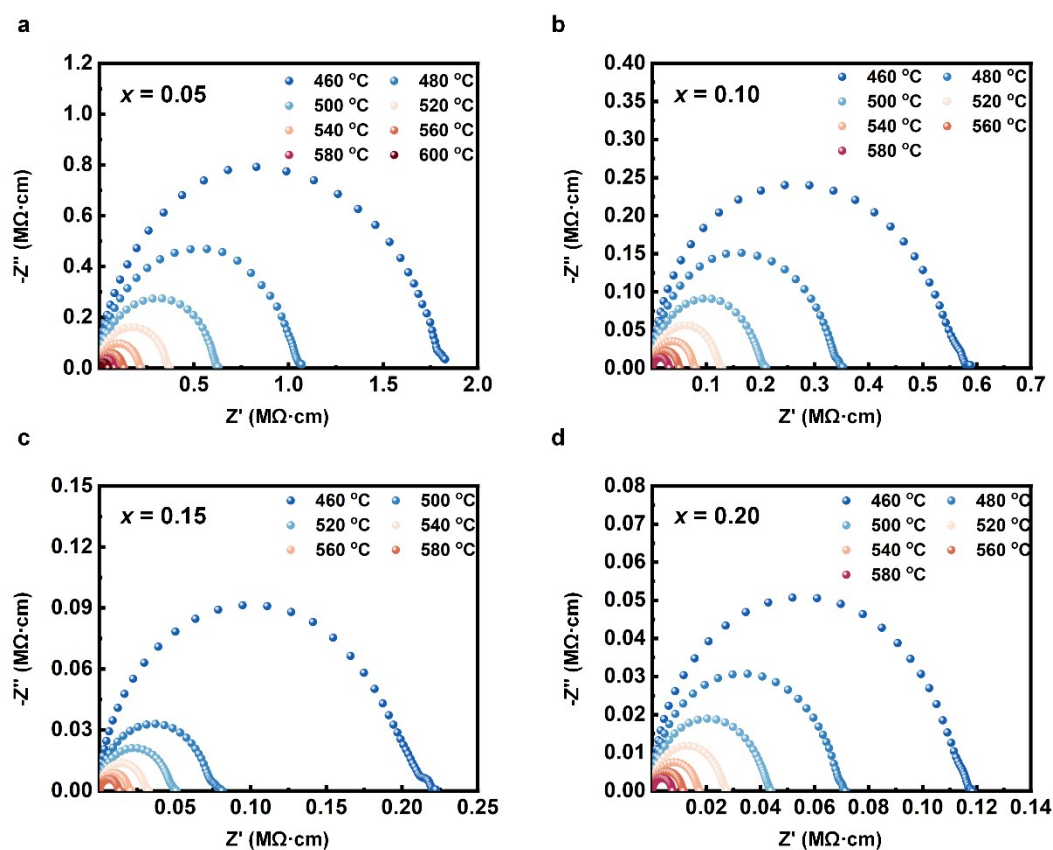

**Figure S1** Impedance spectrum of  $(1 - x)\text{BNT}-x\text{SF}$  dielectric ceramics: (a)  $x = 0.05$ , (b)  $x = 0.1$ , (c)  $x = 0.15$ , AND (d)  $x = 0.20$ .

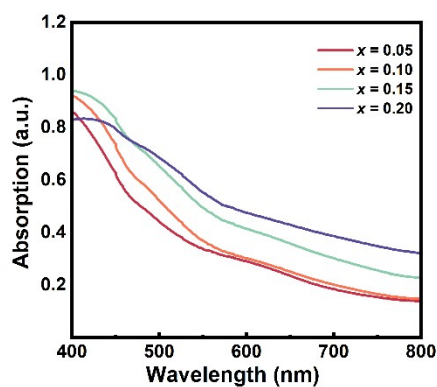

**Figure S2** UV-vis absorption spectrum of the  $(1 - x)\text{BNT} - x\text{SF}$  ( $x = 0.05, 0.10, 0.15,$  and  $0.20$ ) ceramics.

**Table S1.** A comparison of  $W_{\text{rec}}$  between  $0.9\text{BNT} - 0.1\text{SF}$  and other reported BNT-based lead-free bulk ceramics.

| Composition                     | $W_{\text{rec}}$ (J/cm <sup>3</sup> ) | $\eta$ (%) | Reference |
|---------------------------------|---------------------------------------|------------|-----------|
| 0.8BNST–0.2Ba(5M)O <sub>3</sub> | 4.89                                  | 92.1       | 1         |
| 0.8BNST–0.2Ba(5M)O <sub>3</sub> | 7.16                                  | 93.3       | 2         |
| BNKTYN–9NN                      | 1.6                                   | 73.1       | 3         |
| BNT–BZT–0.04Sm                  | 1.12                                  | 89.6       | 4         |
| 0.8BNT–0.2CT                    | 1.26                                  | 91.3       | 5         |
| BNBT–4LZNT                      | 1.66                                  | 73.97      | 6         |
| BNBT–0.2NNCS                    | 1.86                                  | 88.23      | 7         |
| BNT–BT–BSTN                     | 2.07                                  | 94.5       | 8         |
| 0.88(0.85BNT–0.15BSmT)–0.12NN   | 2.42                                  | 81.18      | 9         |
| 0.6BNT–0.4STS                   | 2.47                                  | 83.2       | 10        |
| BNT–0.25CT                      | 2.74                                  | 91         | 11        |
| 0.85BNKT–0.15SMN                | 3.5                                   | 86         | 12        |
| BNST–0.15BMS                    | 3.76                                  | 78.8       | 13        |
| 0.70BLNBT–0.30STN               | 4.2                                   | 89.3       | 14        |
| BNKMN–0.3SLT                    | 4.03                                  | 85.2       | 15        |
| BNST–0.1AN                      | 4.3                                   | 83         | 16        |
| 0.94(BNST–BMN)–0.06BZ           | 4.07                                  | 91         | 17        |

|                 |      |       |    |
|-----------------|------|-------|----|
| BNST-0.15BNH    | 4.11 | 82.1  | 18 |
| 0.6BS-0.4NN     | 4.44 | 81.8  | 19 |
| BSNBT-0.08BBT   | 4.62 | 79.1  | 20 |
| BS-0.15BMT      | 4.82 | 84.9  | 21 |
| 0.7BNLT-0.3NN   | 4.83 | 78.9  | 22 |
| BNT-NN/7wt%CZT  | 4.93 | 93.3  | 23 |
| BNT-SLnT        | 4.94 | 88.45 | 24 |
| BNT-BCZT-0.05BS | 4.97 | 84.4  | 25 |
| BNT-NN-0.25SZM  | 5.2  | 85    | 26 |
| BNT-SBT0.12SZNT | 5.2  | 91    | 27 |
| BNST-0.16BMN    | 5.5  | 90.1  | 28 |
| BNT-0.33SLZT    | 5.09 | 88    | 29 |
| NBT-SBCT-0.2BMH | 5.9  | 85    | 30 |
| NBT-SBT/6AlN    | 5.53 | 90    | 31 |
| BNST-0.12BMH    | 5.59 | 85.3  | 32 |
| BNT-BAT-0.4CT   | 5.81 | 97.8  | 33 |
| NBCSTO          | 5.84 | 80    | 34 |
| BNT-BT-0.12La   | 5.93 | 77.6  | 35 |
| BNT-SST-0.03LMN | 5.94 | 86.9  | 36 |
| BNT-ST-0.08BMS  | 5.99 | 76    | 37 |
| BNT-0.15ANT     | 6.6  | 72    | 38 |

|                  |             |             |    |
|------------------|-------------|-------------|----|
| BNBT-0.06CH      | 6.19        | 93.5        | 39 |
| BNLT-0.16SANT    | 6.43        | 88          | 40 |
| BNCTZ-0.5wt%LC   | 6.57        | 70          | 41 |
| 0.9NBST-0.1BMS   | 6.68        | 89.1        | 42 |
| BNT-SBT-0.08LMT  | 7.3         | 93          | 43 |
| BNT-CBT-0.28NBCT | 7.13        | 83          | 44 |
| BNTSNA           | 7           | 95          | 45 |
| 0.88BNT-0.12BT   | 8           | 86          | 46 |
| <b>My work</b>   | <b>9.05</b> | <b>71.4</b> |    |

**Table S2.** Comparison of  $W_{\text{rec}}$  in these Pb-free ceramics with different  $E_b$  (Except for some of the work in **Table S1**).

| Composition                                                                     | $W_{\text{rec}}$ (J/cm <sup>3</sup> ) | $E_b$ (kV/cm) | Reference |
|---------------------------------------------------------------------------------|---------------------------------------|---------------|-----------|
| BTP3                                                                            | 0.41                                  | 75            | 47        |
| Ba(Ti <sub>0.9744</sub> Mn <sub>0.01</sub> Nb <sub>0.0125</sub> )O <sub>3</sub> | 0.43                                  | 105           | 48        |
| 0.9BT-0.1BMN-0.3 wt. % MnCO <sub>3</sub>                                        | 1.7                                   | 210           | 49        |
| 0.88BT-0.12BMS                                                                  | 2.25                                  | 240           | 50        |
| 0.9BT-0.1BNS                                                                    | 2.52                                  | 240           | 51        |
| BT-Ta                                                                           | 2.85                                  | 350           | 52        |
| 0.9BST-0.1BMN                                                                   | 3.34                                  | 400           | 53        |
| BT-BZ-0.4CT                                                                     | 3.46                                  | 590           | 54        |
| BT-SBT-NdVPP                                                                    | 4.2                                   | 460           | 55        |

|                                                                                  |      |     |    |
|----------------------------------------------------------------------------------|------|-----|----|
| 0.65BT-0.35(SBT-BMZ)                                                             | 4.03 | 370 | 56 |
| BT-0.16BMS                                                                       | 4.28 | 550 | 57 |
| BT-BLN-0.072BMT                                                                  | 4.42 | 500 | 58 |
| BT-SBT-0.015CT                                                                   | 4    | 480 | 59 |
| BT-H(Mg)                                                                         | 5.18 | 640 | 60 |
| BBTMT-0.1                                                                        | 5.97 | 710 | 61 |
| BT-BMT-0.15NT                                                                    | 6.02 | 780 | 62 |
| $(\text{Ag}_{0.92}\text{Sr}_{0.04})(\text{Nb}_{0.78}\text{Ta}_{0.22})\text{O}_3$ | 5.6  | 300 | 63 |
| $\text{Ag}_{0.94}\text{La}_{0.02}\text{Nb}_{0.8}\text{Ta}_{0.2}\text{O}_3$       | 6.73 | 540 | 64 |
| $\text{Ag}_{0.91}\text{La}_{0.03}\text{Nb}_{0.9}\text{Ta}_{0.1}\text{O}_3$       | 8.6  | 460 | 65 |
| BF-BT-0.08SMZTN                                                                  | 2.4  | 190 | 66 |
| BNFT-SBT-NT                                                                      | 3.44 | 210 | 67 |
| BF-BT-0.15SSNA                                                                   | 3.95 | 300 | 68 |
| BF-ST-LMN                                                                        | 6.3  | 450 | 69 |
| BF-BHfTiO <sub>3</sub> -0.17NT                                                   | 6.3  | 425 | 70 |
| BFO-0.5(BST-BZN)                                                                 | 7.4  | 680 | 71 |
| BF-BT-0.14SSN                                                                    | 8.5  | 470 | 72 |
| 0.8BNST-0.2Ba(5M)O <sub>3</sub>                                                  | 4.89 | 351 | 1  |
| BNKTYN-9NN                                                                       | 1.6  | 110 | 3  |
| 0.8BNT-0.2CT                                                                     | 1.26 | 150 | 5  |
| BNBT-4LZNT                                                                       | 1.66 | 139 | 6  |

|                                             |      |     |    |
|---------------------------------------------|------|-----|----|
| BNT-ST: 0.1 wt% AlN                         | 2.07 | 160 | 73 |
| 0.88(0.85BNT-0.15BSmT)-0.12NN               | 2.42 | 170 | 74 |
| 0.85BNKT-0.15SMN                            | 3.5  | 300 | 12 |
| BNKMN-0.3SLT                                | 4.03 | 300 | 15 |
| BNST-0.1AN                                  | 4.3  | 230 | 16 |
| 0.94(BNST-BMN) -0.06BZ                      | 4.07 | 260 | 17 |
| BNST-0.15BNH                                | 4.11 | 240 | 18 |
| 0.6BS-0.4NN                                 | 4.44 | 260 | 19 |
| BNKST-0.15BMT                               | 4.82 | 270 | 21 |
| BNT-SL <sub>n</sub> T                       | 4.94 | 440 | 24 |
| BNT-NN-0.25SZM                              | 5.2  | 370 | 26 |
| BNT-SBT0.12SZNT                             | 5.2  | 330 | 27 |
| NBT-SBCT-0.2BMH                             | 5.9  | 260 | 30 |
| NBT-SBT/6AlN                                | 5.53 | 360 | 31 |
| NBCSTO                                      | 5.84 | 430 | 34 |
| BNT-BT-0.12La                               | 5.93 | 440 | 35 |
| BNLT-0.16SANT                               | 6.43 | 505 | 40 |
| BNCTZ-0.5wt%LC                              | 6.57 | 380 | 41 |
| 0.9NBST-0.1BMS                              | 6.68 | 405 | 42 |
| BNT-SBT-0.08LMT                             | 7.3  | 390 | 43 |
| 0.85(0.76BNT <sub>3</sub> -0.04SZ-0.2NN)-0. | 7.05 | 387 | 75 |



| 15MnO <sub>2</sub>                                             |      |       |    |
|----------------------------------------------------------------|------|-------|----|
| 0.6BNT-0.4(0.7ST-0.3BLT)-0.5at.                                | 8.63 | 520   | 76 |
| %Nb <sub>2</sub> O <sub>5</sub>                                |      |       |    |
| 0.80NN-0.20BNH                                                 | 6.45 | 380   | 77 |
| NN-BMT-0.15BNST                                                | 6.49 | 540   | 78 |
| 0.6(0.96NN-0.04BF)-0.4CT                                       | 6.84 | 712   | 79 |
| NN-BMT-0.15ST                                                  | 6    | 590   | 80 |
| NN-BNT-0.2CT                                                   | 7.1  | 646   | 81 |
| 0.52BF-0.4ST-0.08NN                                            | 4.4  | 300   | 82 |
| BF-ST-SBT                                                      | 5.61 | 440   | 83 |
| ST-CA-MT-BCB                                                   | 1.05 | 287.8 | 84 |
| BNT-SBT-0.24ST-0.06SZ                                          | 1.25 | 108   | 85 |
| ST-0.4BNKTZS                                                   | 1.45 | 100   | 86 |
| 0.9SBT-0.1BMH                                                  | 3.1  | 360   | 87 |
| 0.9SBT-0.1Bi(M <sub>1</sub> M <sub>2</sub> )O <sub>3</sub>     | 3.71 | 340   | 88 |
| BNLST-0.4ST                                                    | 3.78 | 360   | 89 |
| 0.5BNT-0.5Sr <sub>0.7</sub> Sm <sub>0.2</sub> TiO <sub>3</sub> | 3.81 | 305   | 90 |
| 0.3SNBT                                                        | 3.94 | 390   | 91 |
| Dy <sub>0.008</sub> Sr <sub>0.992</sub> TiO <sub>3</sub>       | 4    | 510   | 92 |
| BNT-ST-SNN                                                     | 5.22 | 340   | 93 |
| 0.2SNBCT                                                       | 6    | 440   | 94 |

## Reference

1. W. Qiao, J. Mei, M. Bai, J. Xu, Y. Gao, X. Zhu, Y. Hu, Y. Li, X. Hao and X. Lou, *Scr. Mater.*, 2024, **243**, 115966.
2. W. Qiao, Z. Xu, W. Yuan, J. Xu, Y. Gao, M. Bai, X. Zhu, Y. Hu and X. Lou, *Chem. Eng. J.*, 2023, **477**, 147167.
3. F. Yang, Q. Li, A. Zhang, Y. Jia, Y. Sun, W. Wang and H. Fan, *J. Alloys Compd.*, 2022, **925**, 166782.
4. Z. Pan, H. Hao, D. Li, Q. Guo, Z. Yao, M. Cao and H. Liu, *J. Mater. Sci.: Mater. Electron.*, 2022, **33**, 14644-14654.
5. J. Wang, F. Zhang, Z. Peng, X. Chao and Z. Yang, *J. Materiomics*, 2022, **8**, 1077-1085.
6. Y. Chen, Y. Wang, D. Zhao, H. Wang, X. He, Q. Zheng and D. Lin, *Mater. Chem. Phys.*, 2022, **290**, 126542.
7. Y. Chen, Y. Qi, D. Zhao, X. He, Y. Wang, Q. Zheng and D. Lin, *Ceram. Int.*, 2022, **48**, 30066-30077.
8. J. He, X. Liu, Y. Zhao, H. Du, T. Zhang and J. Shi, *ACS Appl. Electron. Mater.*, 2022, **4**, 735-743.
9. Q. Lin, Z. Deng, W. Dou, Y. Wu and Y. Ma, *Ceram. Int.*, 2022, **48**, 34688-34696.
10. X. Qiao, X. Chao and Z. Yang, *J. Mater. Sci.: Mater. Electron.*, 2022, **33**, 2012-2019.
11. Z. Jiang, Y. Yuan, H. Yang, E. Li and S. Zhang, *J. Am. Ceram. Soc.*, 2022, **105**, 4027-4038.
12. B. Yan, K. Chen and L. An, *Ceram. Int.*, 2022, **48**, 37020-37026.
13. X. Li, X. Dong, F. Wang, Z. Tan, Q. Zhang, H. Chen, J. Xi, J. Xing, H. Zhou and J. Zhu, *J. Eur. Ceram. Soc.*, 2022, **42**, 2221-2229.
14. L. Wu, L. Tang, Y. Zhai, Y. Zhang, J. Sun, D. Hu, Z. Pan, Z. Su, Y. Zhang and J. Liu, *J. Materiomics*, 2022, **8**, 537-544.
15. H.-l. Lian, X.-j. Liang, M. Shi, L.-n. Liu and X.-m. Chen, *Ceram. Int.*, 2024, **50**, 5021-5031.
16. H. Xie, H. Du, L. Liu, Q. Kou, J. Xu, Y. Sun, R. Lv, Y. Chang and D. Wang, *Chem. Eng. J.*, 2022, **450**, 138432.
17. P. Shi, Z. Hong, X. Zhu, Q. Liu, B. Yang, T. Li, R. Kang, J. Zhao, C. Kong, Y. Hu, X. Ke, S. Yang and X. Lou, *Appl. Phys. Lett.*, 2022, **120**, 132903.
18. K. Wang, W. Li, R. Zhao, X. Tang, S. Zhang, Y. Zhang, J. Hu, Z. Shen, Y. Jiang and X. Guo, *Ceram. Int.*, 2024, **50**, 5276-5284.
19. W. Shi, Y. Yang, L. Zhang, R. Jing, Q. Hu, D. O. Alikin, V. Y. Shur, J. Gao, X. Wei and L. Jin, *Ceram. Int.*, 2022, **48**, 6512-6519.
20. Y. Shen, L. Wu, J. Zhao, J. Liu, L. Tang, X. Chen, H. Li, Z. Su, Y. Zhang, J. Zhai and Z. Pan, *Chem. Eng. J.*, 2022, **439**, 135762.
21. K. Shang, W. Shi, Y. Yang, L. Zhang, Q. Hu, X. Wei and L. Jin, *Ceram. Int.*, 2022, **48**, 37223-37231.
22. Y. Lu, P. Li, J. Du, P. Fu, J. Hao, H. Zeng and W. Li, *Ceram. Int.*, 2022, **48**, 24716-24724.
23. Y. chen, Y. Huang, Y. Zuo, H. Wang, K. Liu, B. Fan, Q. Zhang, G. Zhang, S. Jiang and M. Shen, *J. Eur. Ceram. Soc.*, 2022, **42**, 6985-6996.

24. Y. Jiao, S. Song, F. Chen, X. Zeng, X. Wang, C. Song, G. Liu and Y. Yan, *Ceram. Int.*, 2022, **48**, 10885-10894.
25. P. Shi, X. Zhu, X. Lou, B. Yang, Q. Liu, C. Kong, S. Yang, L. He, R. Kang and J. Zhao, *Chem. Eng. J.*, 2022, **428**, 132612.
26. C. Zhu, Z. Cai, L. Guo, Y. Jiang, L. Li and X. Wang, *ACS Appl. Energy Mater.*, 2022, **5**, 1560-1570.
27. Z. Wang, L. Zhang, R. Kang, W. Yang, L. He, P. Mao, X. Lou, L. Zhang and J. Wang, *Chem. Eng. J.*, 2022, **431**, 133716.
28. X. Li, Y. Cheng, F. Wang, Q. Xu, Y. Chen, L. Xie, Z. Tan, J. Xing and J. Zhu, *Chem. Eng. J.*, 2022, **431**, 133441.
29. R. Kang, Z. Wang, W. Yang, X. Zhu, L. He, Y. Gao, J. Zhao, P. Shi, Y. Zhao, P. Mao, Y. Hu, L. Zhang and X. Lou, *Chem. Eng. J.*, 2022, **446**, 137105.
30. X. Zhang, G. Chen, Z. Liu, X. Miao, Z. Zhang, D. Chen, K.-H. Lam, M. Zeng, X. Gao and J.-M. Liu, *Chem. Eng. J.*, 2024, **480**, 147973.
31. D. You, H. Tan, Z. Yan, H. Gao, S. Chen, W. Ma, P. Fan, N.-M.-A. Tran, Y. Liu, D. Salamon and H. Zhang, *ACS Appl. Mater. Interfaces*, 2022, **14**, 17652-17661.
32. X. Zhu, P. Shi, Y. Gao, R. Kang, J. Zhao, A. Xiao, W. Qiao, J. Zhao, Z. Wang and X. Lou, *Chem. Eng. J.*, 2022, **437**, 135462.
33. C. Li, J. Liu, W. Bai, S. Wu, P. Zheng, J. Zhang, Z. Pan and J. Zhai, *J. Mater. Chem. A*, 2022, **10**, 9535-9546.
34. T. Li, X. Yang, Q. Cheng, A. Xie, X. Jiang, C. Zhou, Y. Zhang and R. Zuo, *J. Alloys Compd.*, 2024, **970**, 172524.
35. B. Chu, J. Hao, P. Li, Y. Li, W. Li, L. Zheng and H. Zeng, *ACS Appl. Mater. Interfaces*, 2022, **14**, 19683-19696.
36. Q. Su, Z. Ma, J. Zhu, N. Sun, Y. Zhao, C. Lu, P. Han, Y. Li and X. Hao, *ACS Appl. Energy Mater.*, 2022, **5**, 15247-15256.
37. C. Liu, H. Zhang, P. Gao, X. Huang, R. Zhang, F. Zhuo, H. Wan, Z. Liu and Y. Pu, *Ceram. Int.*, 2024, **50**, 5198-5209.
38. Z. Che, L. Ma, G. Luo, C. Xu, Z. Cen, Q. Feng, X. Chen, K. Ren and N. Luo, *Nano Energy*, 2022, **100**, 107484.
39. C. Luo, Y. Wei, Q. Feng, M. Wang, N. Luo, C. Yuan, C. Zhou, T. Fujita and J. Xu, *Chem. Eng. J.*, 2022, **429**, 132165.
40. Z. Wang, R. Kang, W. Liu, L. Zhang, L. He, S. Zhao, H. Duan, Z. Yu, F. Kang, Q. Sun, T. Zhang, P. Mao, J. Wang and L. Zhang, *Chem. Eng. J.*, 2022, **427**, 131989.
41. L. Zhang, S. Cao, Y. Li, R. Jing, Q. Hu, Y. Tian, R. Gu, J. Kang, D. O. Alikin, V. Y. Shur, X. Wei, G. Liu, F. Gao, H. Du, Y. Yan and L. Jin, *J. Alloys Compd.*, 2022, **896**, 163139.
42. Y. Gao, X. Zhu, B. Yang, P. Shi, R. Kang, Y. Yuan, Q. Liu, M. Wu, J. Gao and X. Lou, *Chem. Eng. J.*, 2022, **433**, 133584.
43. R. Kang, Z. Wang, M. Wu, S. Cheng, S. Mi, Y. Hu, L. Zhang, D. Wang and X. Lou, *Nano Energy*, 2023, **112**, 108477.
44. P. Chen, W. Cao, T. Li, B. Zhao, J. Zheng and C. Wang, *Chem. Eng. J.*, 2022, **435**, 135065.
45. F. Yan, H. Bai, G. Ge, J. Lin, K. Zhu, G. Li, J. Qian, B. Shen, J. Zhai and Z. Liu, *Small*, 2022, **18**, 2202575.
46. Y. Zhang, A. Xie, J. Fu, X. Jiang, T. Li, C. Zhou and R. Zuo, *ACS Appl. Mater. Interfaces*, 2022,

- 14**, 40043-40051.
47. C. Zhu, X. Wang, Q. Zhao, Z. Cai, Z. Cen and L. Li, *J. Eur. Ceram. Soc.*, 2019, **39**, 1142-1148.
  48. W. Liu, J. Gao, Y. Zhao and S. Li, *J. Alloys Compd.*, 2020, **843**, 155938.
  49. W.-B. Li, D. Zhou and L.-X. Pang, *Appl. Phys. Lett.*, 2017, **110**, 132902.
  50. F. Si, B. Tang, Z. Fang, H. Li and S. Zhang, *J. Alloys Compd.*, 2020, **819**, 153004.
  51. F. Si, B. Tang, Z. Fang, H. Li and S. Zhang, *Ceram. Int.*, 2019, **45**, 17580-17590.
  52. Y. Zhang, G. Zhang, A. Li, J.-H. Zhang, Y. Zheng, G. Luo, R. Tu, J. Zhang, Q. Shen and L. Zhang, *J. Am. Ceram. Soc.*, 2023, **106**, 6630-6640.
  53. Z. Dai, J. Xie, W. Liu, X. Wang, L. Zhang, Z. Zhou, J. Li and X. Ren, *ACS Appl. Mater. Interfaces*, 2020, **12**, 30289-30296.
  54. K. Xi, J. Liu, B. Song, H. Cheng, Y. Li, X. Yu, M. Zheng, M. Zhu and Y. Hou, *J. Eur. Ceram. Soc.*, 2024, **44**, 1588-1596.
  55. Y. Li, Y. Liu, M. Tang, J. Lv, F. Chen, Q. Li, Y. Yan, F. Wu, L. Jin and G. Liu, *Chem. Eng. J.*, 2021, **419**, 129673.
  56. D. Hu, Z. Pan, X. Tan, F. Yang, J. Ding, X. Zhang, P. Li, J. Liu, J. Zhai and H. Pan, *Chem. Eng. J.*, 2021, **409**, 127375.
  57. S. Yang, D. Zeng, Q. Dong, Y. Pan, P. Nong, M. Xu, X. Chen, X. Li and H. Zhou, *J. Energy Storage*, 2024, **78**, 110102.
  58. W.-B. Li, D. Zhou, W.-F. Liu, J.-Z. Su, F. Hussain, D.-W. Wang, G. Wang, Z.-L. Lu and Q.-P. Wang, *Chem. Eng. J.*, 2021, **414**, 128760.
  59. Y. Li, M.-Y. Tang, Z.-G. Zhang, Q. Li, J.-L. Li, Z. Xu, G. Liu and F. Li, *Rare Met.*, 2023, **42**, 1261-1273.
  60. M. Bai, W. Qiao, J. Mei, R. Kang, Y. Gao, Y. Wu, Y. Hu, Y. Li, X. Hao, J. Zhao, H. Hu and X. Lou, *J. Alloys Compd.*, 2024, **970**, 172671.
  61. M. Yin, Y. Zhang, H.-R. Bai, P. Li, Y.-C. Li, W.-F. Han, J.-G. Hao, W. Li, C.-M. Wang and P. Fu, *Journal of Materials Science & Technology*, 2024, **184**, 207-220.
  62. R. Lang, Q. Chen, T. Gao, J. Zhu, J. Xing and Q. Chen, *J. Eur. Ceram. Soc.*, 2024, **44**, 3916-3925.
  63. J. Zhou, J. Du, L. Chen, Y. Li, L. Xu, Q. Zhao, H. Yang, J. Ding, Z. Sun, X. Hao and X. Wang, *J. Eur. Ceram. Soc.*, 2023, **43**, 6059-6068.
  64. B. Li, Z. Yan, X. Zhou, H. Qi, V. Koval, X. Luo, H. Luo, H. Yan and D. Zhang, *ACS Appl. Mater. Interfaces*, 2023, **15**, 4246-4256.
  65. L. He, Y. Yang, C. Liu, Y. Ji, X. Lou, L. Zhang and X. Ren, *Acta Mater.*, 2023, **249**, 118826.
  66. S. Chen, T. Wang, S. Xie, J. Leng, Q. Zhu, K. Li, W. Gong, J. Zhu and Q. Wang, *ACS Appl. Mater. Interfaces*, 2024, DOI: 10.1021/acsami.3c18262.
  67. Y. Yang, P. Ren, N. Ma, X. Li, X. Qi and Y. Wan, *Int. J. Appl. Ceram. Technol.*, 2023, **n/a**.
  68. S. Liu, W. Feng, J. Li, C. Zhao, C. Hu, B. He, Z. Bao and X. Luan, *Chem. Eng. J.*, 2023, **451**, 138916.
  69. Z.-N. Guan, J. Wang, T. Pan, J. Zhang, J. Wang and Y. Wang, *Inorg. Chem.*, 2023, **62**, 1234-1239.
  70. H. Guo, F. Zeng, W. Xiao, S. Jiang, Y. Chen, B. Wang, G. Fan, W. Lu and Z. Tu, *Chem. Eng. J.*, 2023, **461**, 142071.
  71. J. Zhao, T. Hu, Z. Fu, Z. Pan, L. Tang, X. Chen, H. Li, J. Hu, L. Lv, Z. Zhou, J. Liu, P. Li and J.

- Zhai, *Small*, 2023, **19**, 2206840.
72. N. Weng, J. Zhang, Z. Wang, H. Wang, L. Wang, J. Wang and Y. Wang, *Chem. Eng. J.*, 2024, **485**, 149947.
73. X. Chen, D. Zhang, H. Liu, C. Zhou, M. Shen, P. Liu, W. Cai, H. Zhang, B. Fan and X. Liu, *Ceram. Int.*, 2022, **48**, 31381-31388.
74. Q. Lin, Z. Deng, W. Dou, Y. Wu and Y. Ma, *Ceram. Int.*, 2022, **48**, 34688-34696.
75. H. Yang, Z. Cai, C. Zhu, P. Feng and X. Wang, *ACS Sustainable Chem. Eng.*, 2022, **10**, 9176-9183.
76. C. Long, Z. Su, H. Song, A. Xu, L. Liu, Y. Li, K. Zheng, W. Ren, H. Wu and X. Ding, *Energy Storage Mater.*, 2024, **65**, 103055.
77. S. Zhang, W. Li, Y. Zhang, X. Tang, Y. Jiang and X. Guo, *Materials Science and Engineering: B*, 2024, **299**, 117025.
78. Y. Pan, Q. Dong, D. Zeng, P. Nong, M. Xu, H. Zhou, X. Li and X. Chen, *J. Energy Storage*, 2024, **82**, 110597.
79. Y. Zhang, J. Liu, W. Bai, P. Zheng, S. Wu, P. Li and J. Zhai, *Chem. Eng. J.*, 2024, **480**, 147974.
80. P. Nong, D. Zeng, Y. Pan, Q. Dong, M. Xu, X. Wang, J. Wang, H. Zhou, X. Li and X. Chen, *J. Materiomics*, 2024, **10**, 670-681.
81. S. Wu, B. Fu, J. Zhang, H. Du, Q. Zong, J. Wang, Z. Pan, W. Bai and P. Zheng, *Small*, 2023, **19**, 2303915.
82. J. Zhang, Y. Pu, Y. Hao, L. Zhang, B. Wang, Y. Ning and M. Chen, *J. Alloys Compd.*, 2023, **968**, 172147.
83. C. Zhu, W. Ye, P. Zheng, H. Zhang, F. Lu, Q. Fan, J. Zhang, L. Zheng, Y. Zhang and W. Bai, *ACS Appl. Energy Mater.*, 2022, **5**, 8492-8500.
84. L. Li, X. Yu, H. Cai, Q. Liao, Y. Han and Z. Gao, *Materials Science and Engineering: B*, 2013, **178**, 1509-1514.
85. P. Ren, Z. Liu, X. Wang, Z. Duan, Y. Wan, F. Yan and G. Zhao, *J. Alloys Compd.*, 2018, **742**, 683-689.
86. H. Yang, F. Yan, Y. Lin and T. Wang, *J. Alloys Compd.*, 2017, **728**, 780-787.
87. X. Kong, L. Yang, Z. Cheng and S. Zhang, *J. Am. Ceram. Soc.*, 2020, **103**, 1722-1731.
88. Y. Ding, P. Li, J. He, W. Que, W. Bai, P. Zheng, J. Zhang and J. Zhai, *Composites, Part B*, 2022, **230**, 109493.
89. Y. Lu, P. Li, J. Du, C. Hu, J. Hao, K. Zhao, H. Zeng and W. Li, *Int. J. Appl. Ceram. Technol.*, 2023, **20**, 2350-2359.
90. Q. Su, J. Zhu, Z. Ma, X. Meng, Y. Zhao, Y. Li and X. Hao, *Mater. Res. Bull.*, 2022, **148**, 111675.
91. L. Liu, B. Chu, P. Li, P. Fu, J. Du, J. Hao, W. Li and H. Zeng, *Chem. Eng. J.*, 2022, **429**, 132548.
92. X. Guo, Y. Pu, W. Wang, J. Ji, J. Li, R. Shi and M. Yang, *Ceram. Int.*, 2020, **46**, 21719-21727.
93. Y. Lin, R. Wan, P. Zheng, Z. Li, Y. Wang, Q. Fan, L. Zheng, Y. Zhang and W. Bai, *ACS Appl. Electron. Mater.*, 2023, **5**, 4576-4586.
94. L. Liu, Y. Liu, J. Hao, J. Chen, P. Li, S. Chen, P. Fu, W. Li and J. Zhai, *Nano Energy*, 2023, **109**, 108275.
